# Supplementary material
Source: Springer Nature journal article supplement (https://www.springermedizin.de/resource/supplementary/12888_2012_1096_MOESM4_ESM.pdf/9478994)

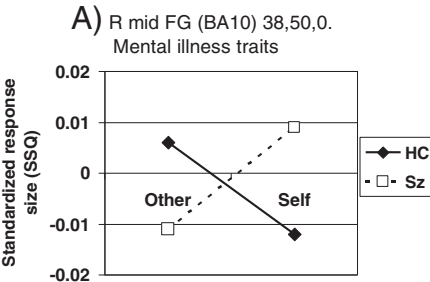

**B)** Correlations with Insight Scores

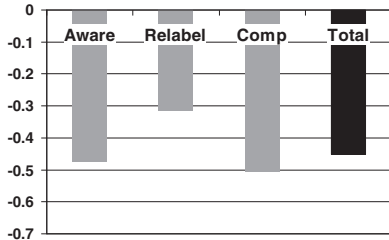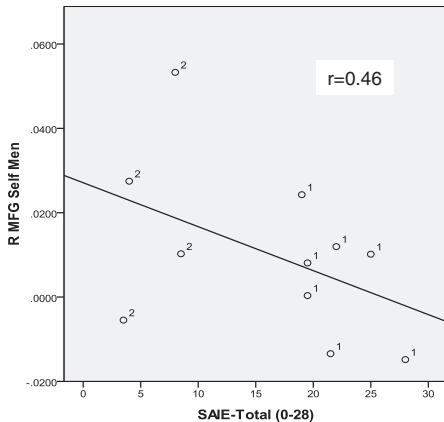

Supplement: MOESM4 [file 9478994]
